# Supplementary material for: Metabolomic Profiling of Bile Acids in Clinical and Experimental Samples of Alzheimer’s Disease
Source: PubMed Central journal article supplement (PMC5487999; doi:10.3390/metabo7020028), 2017-06-17
Supplement: metabolites-07-00028-s001.pdf [file metabolites-07-00028-s001.pdf]

## Supplementary Material

**Supplementary Table 1.** Participant demographics and clinical characteristics for human plasma samples

| AD     |     |                   |              |       | Control |     |                   |              |       |
|--------|-----|-------------------|--------------|-------|---------|-----|-------------------|--------------|-------|
| Gender | Age | Education (years) | Initial MMSE | APOE4 | Gender  | Age | Education (years) | Initial MMSE | APOE4 |
| F      | 73  | 12                | 13           | 44    | F       | 84  | 12                | 30           | na    |
| F      | 70  | 10                | 24           | na    | F       | 87  | 20                | 30           | na    |
| F      | 88  | 10                | 24           | 34    | F       | 76  | 12                | 28           | 33    |
| F      | 75  | 10                | 24           | 33    | M       | 75  | 14                | 30           | 34    |
| F      | 77  | 10                | 25           | 33    | M       | 73  | 10                | 29           | 33    |
| M      | 70  | 12                | 13           | 34    | M       | 86  | 10                | 30           | 34    |
| F      | 77  | 9                 | 24           | 34    | M       | 72  | 10                | 29           | 33    |
| M      | 83  | 14                | 23           | 44    | F       | 71  | 19                | 30           | 33    |
| M      | 75  | 17                | 26           | 34    | M       | 86  | 10                | 28           | 23    |
| M      | 75  | 10                | 23           | 33    | F       | 66  | 13                | 29           | 34    |

**Supplementary Table 2.** The sample cohort provided by Newcastle Brain Trust and the information pertaining to the post-mortem tissue.

| AD     |     |          |             | Control |     |          |             |
|--------|-----|----------|-------------|---------|-----|----------|-------------|
| Gender | Age | PM Delay | Braak Stage | Gender  | Age | PM Delay | Braak Stage |
| F      | 71  | 67       | 5           | F       | 73  | 59       | 1           |
| M      | 75  | 54       | 5           | F       | 72  | 24       | 0           |
| F      | 79  | 27       | 6           | M       | 78  | 48       | 1           |
| F      | 75  | 21       | 6           | M       | 77  | 42       | 1           |
| M      | 78  | 49       | 6           | M       | 73  | 25       | 0           |
| F      | 77  | 63       | 6           | F       | 68  | 38.75    | 0           |
| M      | 78  | 37       | 6           | F       | 74  | 39.5     | 1           |
| M      | 75  | 39.5     | 5           | M       | 80  | 45.75    | 0           |
| F      | 77  | 19       | 6           | M       | 73  | 23       | 0           |
| M      | 77  | 19       | 6           | M       | 77  | 10-11    | 0           |
